# Supplementary material for: Effect of a dragonfly (&lt;i&gt;Bradinopyga strachani&lt;/i&gt; Kirby, 1900) on the density of mosquito larvae in a field experiment using mesocosms
Source: Copernicus journal article supplement (doi:10.5194/we-18-81-2018), 2018-05-24
Supplement: Supplementary file 1 [file database.xlsx]

## Sheet: Sheet1
Effect of a dragonfly (Bradinopyga strachani Kirby, 1900) on the density of mosquito larvae in a field experiment using mesocosms
Daniel Acquah-Lamptey and Roland Brandl
Faculty of Biology, Department of Ecology–Animal Ecology, Philipps Universität Marburg,
Karl-von-Frisch-Strasse 8, 35043 Marburg, Germany
Container code	Day	Shade	Container type	Dragonfly	I	II	III	IV	V	VI
A3	1	yes	Opened	Absent	3	4	6	15	6	3
A4	1	no	Opened	Absent	4	6	6	4	6	4
A5	1	no	Opened	Absent	2	3	3	2	3	3
A6	1	no	Opened	Absent	5	3	5	3	3	3
A7	1	no	Opened	Absent	2	0	2	0	1	0
A8	1	yes	Opened	Absent	15	10	10	8	5	6
A9	1	no	Opened	Absent	2	1	2	2	2	0
A10	1	yes	Opened	Absent	4	4	3	4	4	3
A11	1	no	Opened	Absent	0	4	4	2	2	2
A12	1	yes	Opened	Absent	3	2	3	3	2	2
A13	1	no	Opened	Absent	4	1	3	3	2	4
A17	1	yes	Opened	Absent	0	4	1	2	1	0
A18	1	yes	Opened	Absent	1	0	2	3	2	4
A19	1	no	Opened	Absent	1	0	1	2	3	1
B1	1	yes	Closed	Absent	1	0	1	1	0	0
B2	1	yes	Closed	Absent	2	4	5	6	3	2
B3	1	no	Closed	Absent	3	1	1	4	2	4
B4	1	yes	Closed	Absent	4	4	3	4	4	4
B5	1	no	Closed	Absent	2	0	2	6	3	6
B6	1	no	Closed	Absent	0	4	0	0	0	0
A1	2	yes	Opened	Absent	0	0	0	0	0	0
A2	2	yes	Opened	Absent	4	1	10	7	4	6
A3	2	no	Opened	Present	0	0	0	0	0	0
A4	2	no	Opened	Present	0	0	0	0	0	0
A5	2	no	Opened	Present	0	0	0	0	0	0
A6	2	no	Opened	Present	0	0	0	0	0	0
A7	2	no	Opened	Present	0	0	0	0	0	0
A8	2	yes	Opened	Present	0	0	0	0	0	0
A9	2	no	Opened	Present	0	0	0	0	0	0
A10	2	yes	Opened	Present	0	0	0	0	0	0
A11	2	no	Opened	Present	0	0	0	0	0	0
A12	2	yes	Opened	Present	0	0	0	0	0	0
A13	2	no	Opened	Present	0	0	0	0	0	0
A14	2	yes	Opened	Present	0	0	0	0	0	0
A15	2	no	Opened	Present	0	0	0	0	0	0
A16	2	yes	Opened	Present	0	0	0	0	0	0
A17	2	yes	Opened	Present	0	0	0	0	0	0
A18	2	yes	Opened	Present	0	0	0	0	0	0
A19	2	no	Opened	Present	0	0	0	0	0	0
A20	2	no	Opened	Present	0	0	0	0	0	0
A21	2	yes	Opened	Present	1	0	2	3	2	0
A22	2	no	Opened	Present	0	0	0	0	0	0
A23	2	no	Opened	Present	0	0	0	0	0	0
A24	2	yes	Opened	Present	0	0	0	0	0	0
A25	2	yes	Opened	Absent	0	0	0	0	0	0
B1	2	yes	Closed	Absent	6	4	6	4	2	4
B2	2	yes	Closed	Absent	1	0	1	1	0	1
B3	2	no	Closed	Absent	10	7	5	8	7	10
B4	2	yes	Closed	Absent	0	0	0	0	0	0
B6	2	no	Closed	Absent	0	0	0	0	0	0
B7	2	yes	Closed	Absent	12	3	2	2	3	2
B8	2	yes	Closed	Absent	5	2	6	4	2	3
B9	2	yes	Closed	Absent	6	3	0	0	3	7
B10	2	no	Closed	Absent	4	12	11	9	10	2
A1	3	yes	Opened	Absent	0	0	0	0	0	0
A2	3	yes	Opened	Absent	0	7	4	8	0	1
A3	3	no	Opened	Present	0	1	0	0	0	0
A4	3	no	Opened	Present	0	0	0	0	0	0
A5	3	no	Opened	Present	0	0	0	0	0	0
A6	3	no	Opened	Present	0	0	0	0	0	0
A7	3	no	Opened	Present	0	0	0	0	0	0
A8	3	yes	Opened	Present	0	0	0	0	0	0
A9	3	no	Opened	Present	0	0	0	0	0	0
A10	3	yes	Opened	Present	0	0	0	0	0	0
A11	3	no	Opened	Present	0	0	0	0	0	0
A12	3	yes	Opened	Absent	0	0	0	0	0	0
A13	3	no	Opened	Present	0	0	0	0	0	0
A14	3	yes	Opened	Present	0	0	0	0	0	0
A15	3	no	Opened	Present	0	0	0	0	0	0
A16	3	yes	Opened	Present	4	5	3	0	0	0
A17	3	yes	Opened	Present	0	0	0	0	0	0
A18	3	yes	Opened	Present	0	0	0	0	0	0
A19	3	no	Opened	Present	0	0	0	0	0	0
A20	3	no	Opened	Present	0	0	0	0	0	0
A21	3	yes	Opened	Absent	2	2	1	1	3	0
A22	3	no	Opened	Present	0	0	0	0	0	0
A23	3	no	Opened	Absent	1	2	7	10	5	10
A24	3	yes	Opened	Present	0	0	0	0	0	0
A25	3	yes	Opened	Absent	0	1	0	3	2	0
B1	3	yes	Closed	Absent	9	4	5	3	1	2
B2	3	yes	Closed	Absent	0	0	0	0	0	0
B3	3	no	Closed	Absent	10	6	2	8	1	5
B4	3	yes	Closed	Absent	8	1	5	1	4	0
B6	3	no	Closed	Absent	0	0	0	0	0	0
B7	3	yes	Closed	Absent	2	11	3	8	2	2
B8	3	yes	Closed	Absent	11	1	3	1	2	4
B9	3	yes	Closed	Absent	0	0	0	0	0	0
B10	3	no	Closed	Absent	9	4	7	8	4	3
A1	4	yes	Opened	Absent	0	0	0	0	0	0
A2	4	yes	Opened	Absent	0	0	0	0	0	0
A3	4	no	Opened	Present	5	8	10	2	12	6
A4	4	no	Opened	Present	0	7	0	2	0	0
A5	4	no	Opened	Present	1	0	3	1	0	1
A6	4	no	Opened	Present	1	8	2	0	3	3
A7	4	no	Opened	Present	0	0	0	0	0	0
A8	4	yes	Opened	Present	1	0	0	0	0	0
A9	4	no	Opened	Present	0	0	0	0	0	0
A10	4	yes	Opened	Present	1	0	1	1	3	0
A11	4	no	Opened	Present	0	0	0	0	0	0
A12	4	yes	Opened	Present	0	0	0	0	0	0
A13	4	no	Opened	Present	0	0	0	0	0	0
A14	4	yes	Opened	Present	0	0	0	0	0	0
A15	4	no	Opened	Present	0	0	0	0	0	0
A16	4	yes	Opened	Present	1	0	0	2	0	1
A17	4	yes	Opened	Present	0	0	0	0	0	0
A18	4	yes	Opened	Present	12	0	0	2	0	1
A19	4	no	Opened	Present	3	0	1	1	1	1
A20	4	no	Opened	Present	0	0	0	0	0	0
B1	4	yes	Closed	Absent	1	4	1	0	2	0
B2	4	yes	Closed	Absent	1	6	0	0	2	0
B3	4	no	Closed	Absent	1	0	1	0	2	0
B4	4	yes	Closed	Absent	1	7	6	1	3	2
A1	5	yes	Opened	Absent	0	0	2	1	3	0
A2	5	yes	Opened	Absent	18	25	15	2	30	15
A3	5	no	Opened	Present	0	0	0	0	0	0
A4	5	no	Opened	Present	0	0	0	0	0	0
A5	5	no	Opened	Absent	0	0	0	0	0	0
A6	5	no	Opened	Absent	0	0	0	0	0	0
A7	5	no	Opened	Present	0	0	0	0	0	0
A8	5	yes	Opened	Present	0	0	0	0	0	0
A9	5	no	Opened	Present	0	0	0	0	0	0
A10	5	yes	Opened	Present	0	0	0	0	0	0
A11	5	no	Opened	Present	0	0	0	0	0	0
A12	5	yes	Opened	Present	0	0	0	0	0	0
A13	5	no	Opened	Present	0	0	0	0	0	0
A14	5	yes	Opened	Present	0	0	1	0	0	1
A15	5	no	Opened	Present	0	0	0	0	0	0
A16	5	yes	Opened	Present	2	0	1	3	0	1
A17	5	yes	Opened	Present	0	0	0	0	0	0
A18	5	yes	Opened	Present	0	0	0	0	0	0
A19	5	no	Opened	Present	0	0	0	0	0	0
A20	5	no	Opened	Present	0	0	0	0	0	0
A21	5	yes	Opened	Present	4	2	1	0	3	0
A22	5	no	Opened	Present	0	0	0	0	0	0
A23	5	no	Opened	Absent	6	4	1	2	3	2
A24	5	yes	Opened	Present	0	0	0	0	0	0
B1	5	yes	Closed	Absent	8	6	15	3	5	5
B2	5	yes	Closed	Absent	0	0	3	0	3	2
B3	5	no	Closed	Absent	4	3	0	7	4	5
B4	5	yes	Closed	Absent	9	5	4	1	3	1
B6	5	no	Closed	Absent	5	6	2	3	3	2
B7	5	yes	Closed	Absent	0	0	0	0	0	0
B8	5	yes	Closed	Absent	0	4	1	7	5	4
B9	5	yes	Closed	Absent	2	1	0	3	2	0
B10	5	no	Closed	Absent	5	5	3	3	1	2
A1	6	yes	Opened	Present	7	2	3	5	3	1
A2	6	yes	Opened	Absent	5	6	1	2	3	0
A3	6	no	Opened	Absent	1	1	0	0	4	0
A4	6	no	Opened	Present	0	0	0	0	0	0
A5	6	no	Opened	Absent	1	0	0	0	0	0
A6	6	no	Opened	Present	0	0	0	0	0	0
A7	6	no	Opened	Present	0	0	0	0	0	0
A8	6	yes	Opened	Present	0	0	0	0	0	0
A9	6	no	Opened	Present	0	0	0	0	0	0
A10	6	yes	Opened	Present	0	0	0	0	0	0
A11	6	no	Opened	Present	0	0	0	0	0	0
A12	6	yes	Opened	Present	0	0	0	0	0	0
A13	6	no	Opened	Present	0	0	0	0	0	0
A14	6	yes	Opened	Absent	0	0	1	0	1	0
A15	6	no	Opened	Present	0	0	0	0	0	0
A16	6	yes	Opened	Absent	1	0	1	0	0	1
A17	6	yes	Opened	Present	0	0	0	0	0	0
A18	6	yes	Opened	Present	1	1	3	2	0	0
A19	6	no	Opened	Present	0	0	0	0	0	0
A20	6	no	Opened	Present	0	0	0	0	0	0
A21	6	yes	Opened	Absent	1	2	2	1	2	1
B1	6	yes	Closed	Absent	4	2	4	0	3	2
B2	6	yes	Closed	Absent	12	10	13	1	17	3
B3	6	no	Closed	Absent	0	0	0	3	1	0
B4	6	yes	Closed	Absent	0	0	0	0	0	0
B5	6	yes	Closed	Absent	0	4	2	0	2	2
A1	7	yes	Opened	Present	0	1	4	2	5	5
A2	7	yes	Opened	Absent	4	2	0	3	4	1
A3	7	no	Opened	Absent	3	3	1	5	3	0
A4	7	no	Opened	Present	0	0	0	0	0	0
A5	7	no	Opened	Absent	2	1	0	1	2	4
A6	7	no	Opened	Present	4	1	1	0	1	0
A7	7	no	Opened	Present	0	0	0	0	0	0
A8	7	yes	Opened	Present	0	2	7	8	2	4
A9	7	no	Opened	Present	0	0	0	0	0	0
A10	7	yes	Opened	Present	0	0	0	0	0	0
A11	7	no	Opened	Present	0	0	0	0	0	0
A12	7	yes	Opened	Present	0	0	0	0	0	0
A13	7	no	Opened	Present	0	0	0	0	0	0
A14	7	yes	Opened	Absent	0	1	1	2	0	0
A15	7	no	Opened	Present	0	0	0	0	0	0
A16	7	yes	Opened	Present	0	1	0	0	0	0
A17	7	yes	Opened	Present	0	0	0	0	0	0
A18	7	yes	Opened	Present	0	0	0	0	0	0
A19	7	no	Opened	Present	2	1	3	1	0	2
A20	7	no	Opened	Present	0	0	0	0	0	0
B1	7	yes	Closed	Absent	0	0	6	3	2	2
B3	7	no	Closed	Absent	0	0	3	1	0	1
B4	7	yes	Closed	Absent	3	2	1	0	0	0
B6	7	no	Closed	Absent	1	4	4	3	2	4
A1	8	yes	Opened	Present	0	0	2	0	1	0
A2	8	yes	Opened	Absent	4	0	1	1	0	1
A3	8	no	Opened	Present	0	0	0	1	0	0
A4	8	no	Opened	Absent	0	0	0	0	0	0
A5	8	no	Opened	Present	0	0	0	0	0	0
A6	8	no	Opened	Present	0	0	0	0	0	0
A7	8	no	Opened	Present	0	0	0	0	0	0
A8	8	yes	Opened	Present	3	4	5	0	0	2
A9	8	no	Opened	Present	0	0	0	0	0	0
A10	8	yes	Opened	Present	0	0	0	0	0	0
A11	8	no	Opened	Present	0	0	0	0	0	0
A12	8	yes	Opened	Present	0	0	0	0	0	0
A13	8	no	Opened	Present	0	2	7	3	0	1
A14	8	yes	Opened	Absent	3	6	0	2	2	4
A15	8	no	Opened	Present	0	0	0	0	0	0
A16	8	yes	Opened	Present	3	0	2	1	2	0
A17	8	yes	Opened	Present	0	0	0	0	0	0
A18	8	yes	Opened	Present	0	0	2	1	0	0
A19	8	no	Opened	Present	0	0	0	0	0	0
A20	8	no	Opened	Present	0	0	0	0	0	0
B1	8	yes	Closed	Absent	2	0	2	0	0	0
B2	8	yes	Closed	Absent	0	0	0	0	0	0
B3	8	no	Closed	Absent	1	0	0	0	0	0
B4	8	yes	Closed	Absent	2	3	3	2	2	0
B5	8	yes	Closed	Absent	0	0	0	0	0	0
B6	8	no	Closed	Absent	0	1	1	0	2	1
