# Supplementary material for: Effect of a dragonfly (&lt;i&gt;Bradinopyga strachani&lt;/i&gt; Kirby, 1900) on the density of mosquito larvae in a field experiment using mesocosms
Source: Copernicus journal article supplement (doi:10.5194/we-18-81-2018), 2018-05-24
Supplement: Supplementary file 1 [file we-18-81-2018-supplement.zip]

Archive with 6 entries (6 files):
- we-18-81-2018-supplement-title-page.pdf
- supplement_Fig S4.pdf
- database.xlsx
- supplementary-version4.pdf
- supplement_Fig S6.pdf
- supplement_Fig S5.pdf
