# Supplementary material for: Effect of a dragonfly (&lt;i&gt;Bradinopyga strachani&lt;/i&gt; Kirby, 1900) on the density of mosquito larvae in a field experiment using mesocosms
Source: Copernicus journal article supplement (doi:10.5194/we-18-81-2018), 2018-05-24
Supplement: Supplementary file 1 [file we-18-81-2018-supplement.zip › we-18-81-2018-supplement-title-page.pdf]

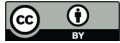

## *Supplement of*

# **Effect of a dragonfly (*Bradinopyga strachani* Kirby, 1900) on the density of mosquito larvae in a field experiment using mesocosms**

**Daniel Acquah-Lampitey and Roland Brandl**

*Correspondence to:* Daniel Acquah-Lampitey ([dacquahlampitey@gmail.com](mailto:dacquahlampitey@gmail.com))

- [we-18-81-2018-supplement-title-page.pdf](#)
- [database.xlsx](#)
- [supplement\\_Fig S4.pdf](#)
- [supplement\\_Fig S5.pdf](#)
- [supplement\\_Fig S6.pdf](#)
- [supplementary-version4.pdf](#)

The copyright of individual parts of the supplement might differ from the CC BY 4.0 License.
