# Supplementary figures and images for: Effect of a dragonfly (&lt;i&gt;Bradinopyga strachani&lt;/i&gt; Kirby, 1900) on the density of mosquito larvae in a field experiment using mesocosms
Source: Copernicus journal article supplement (doi:10.5194/we-18-81-2018), 2018-05-24

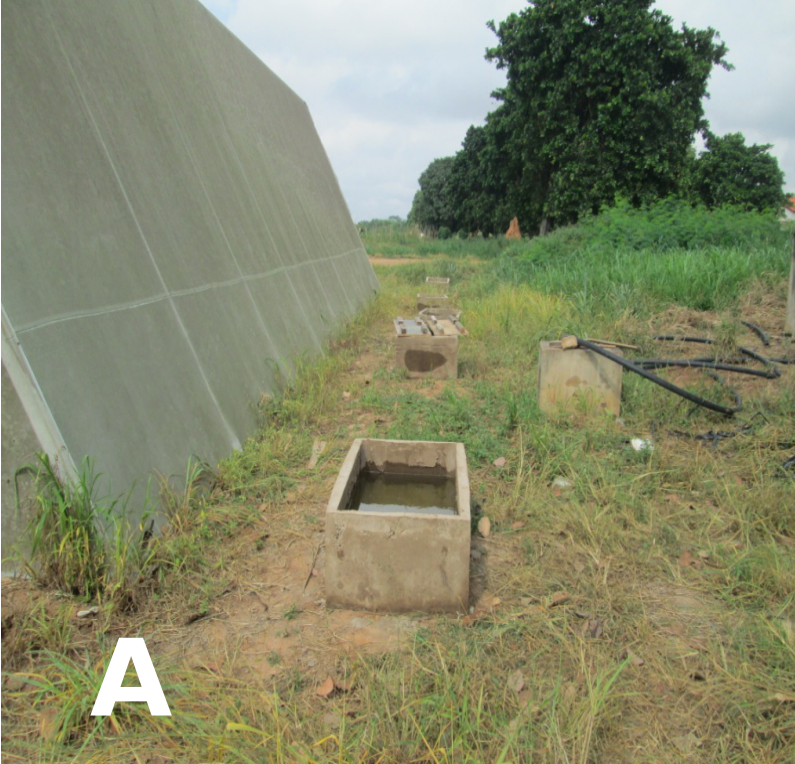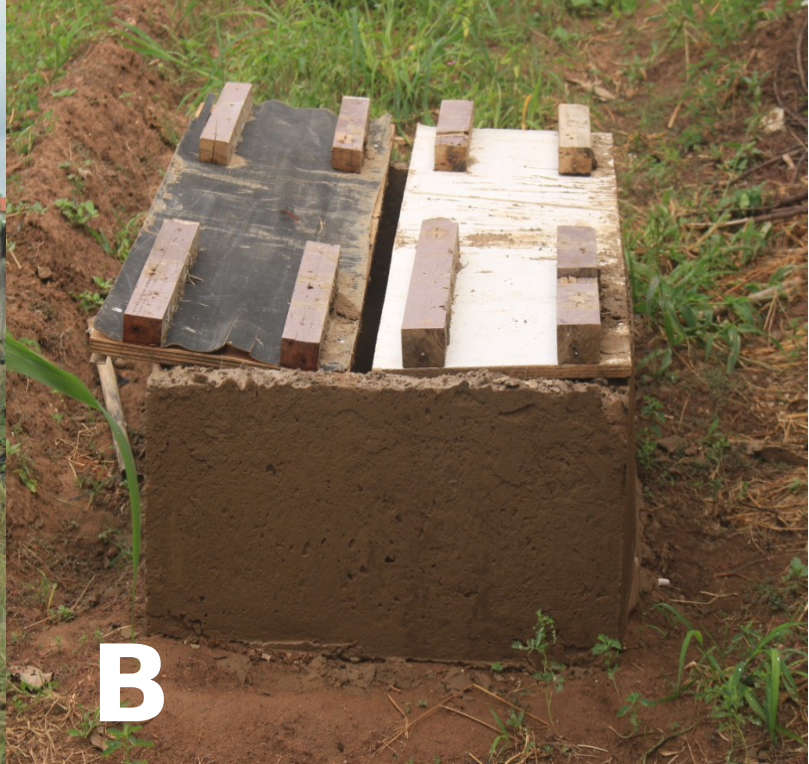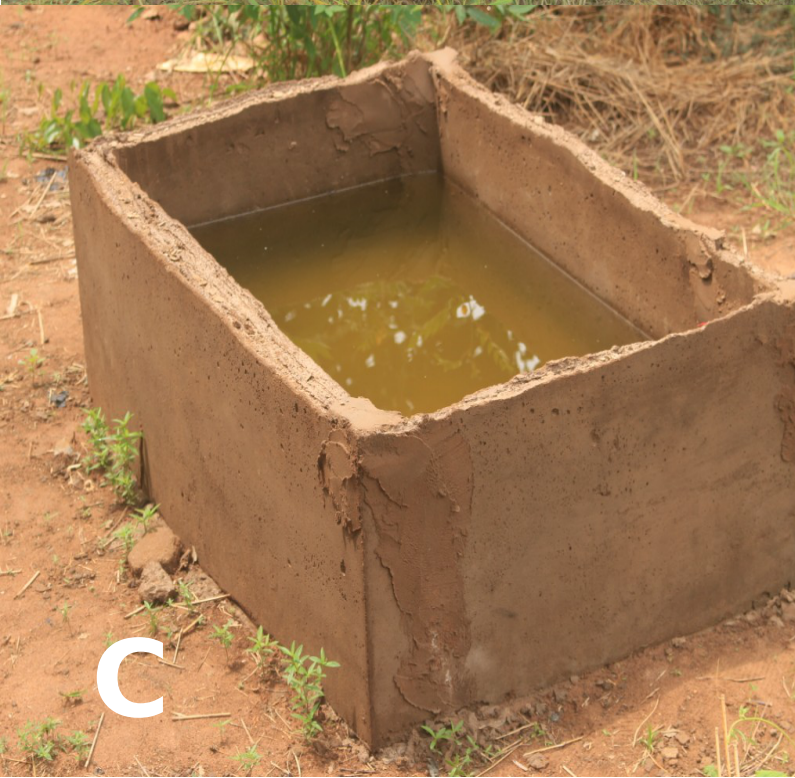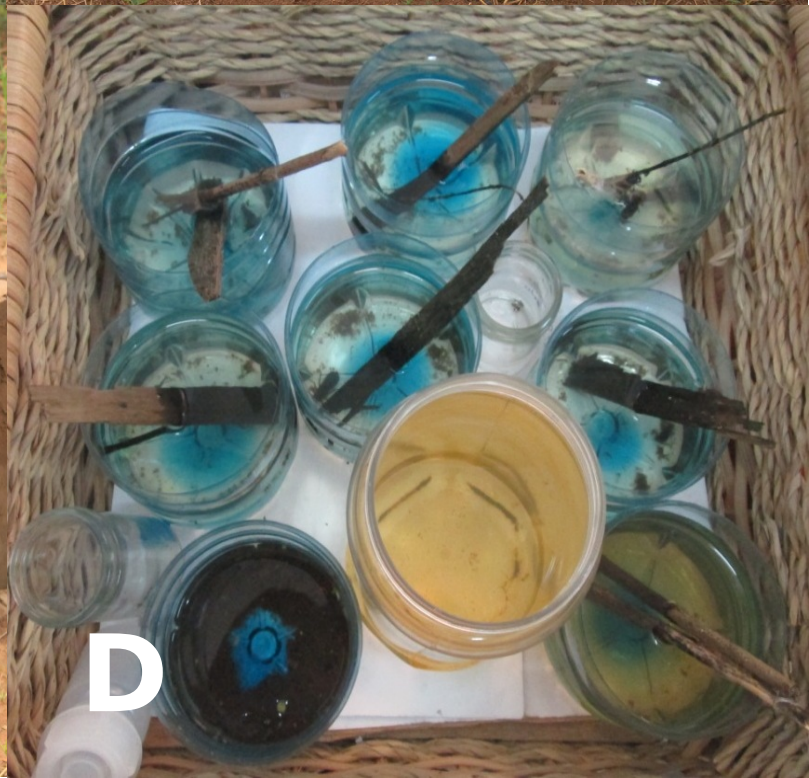

Supplement: Supplementary file 1 [file we-18-81-2018-supplement.zip › supplement_Fig S4.pdf]

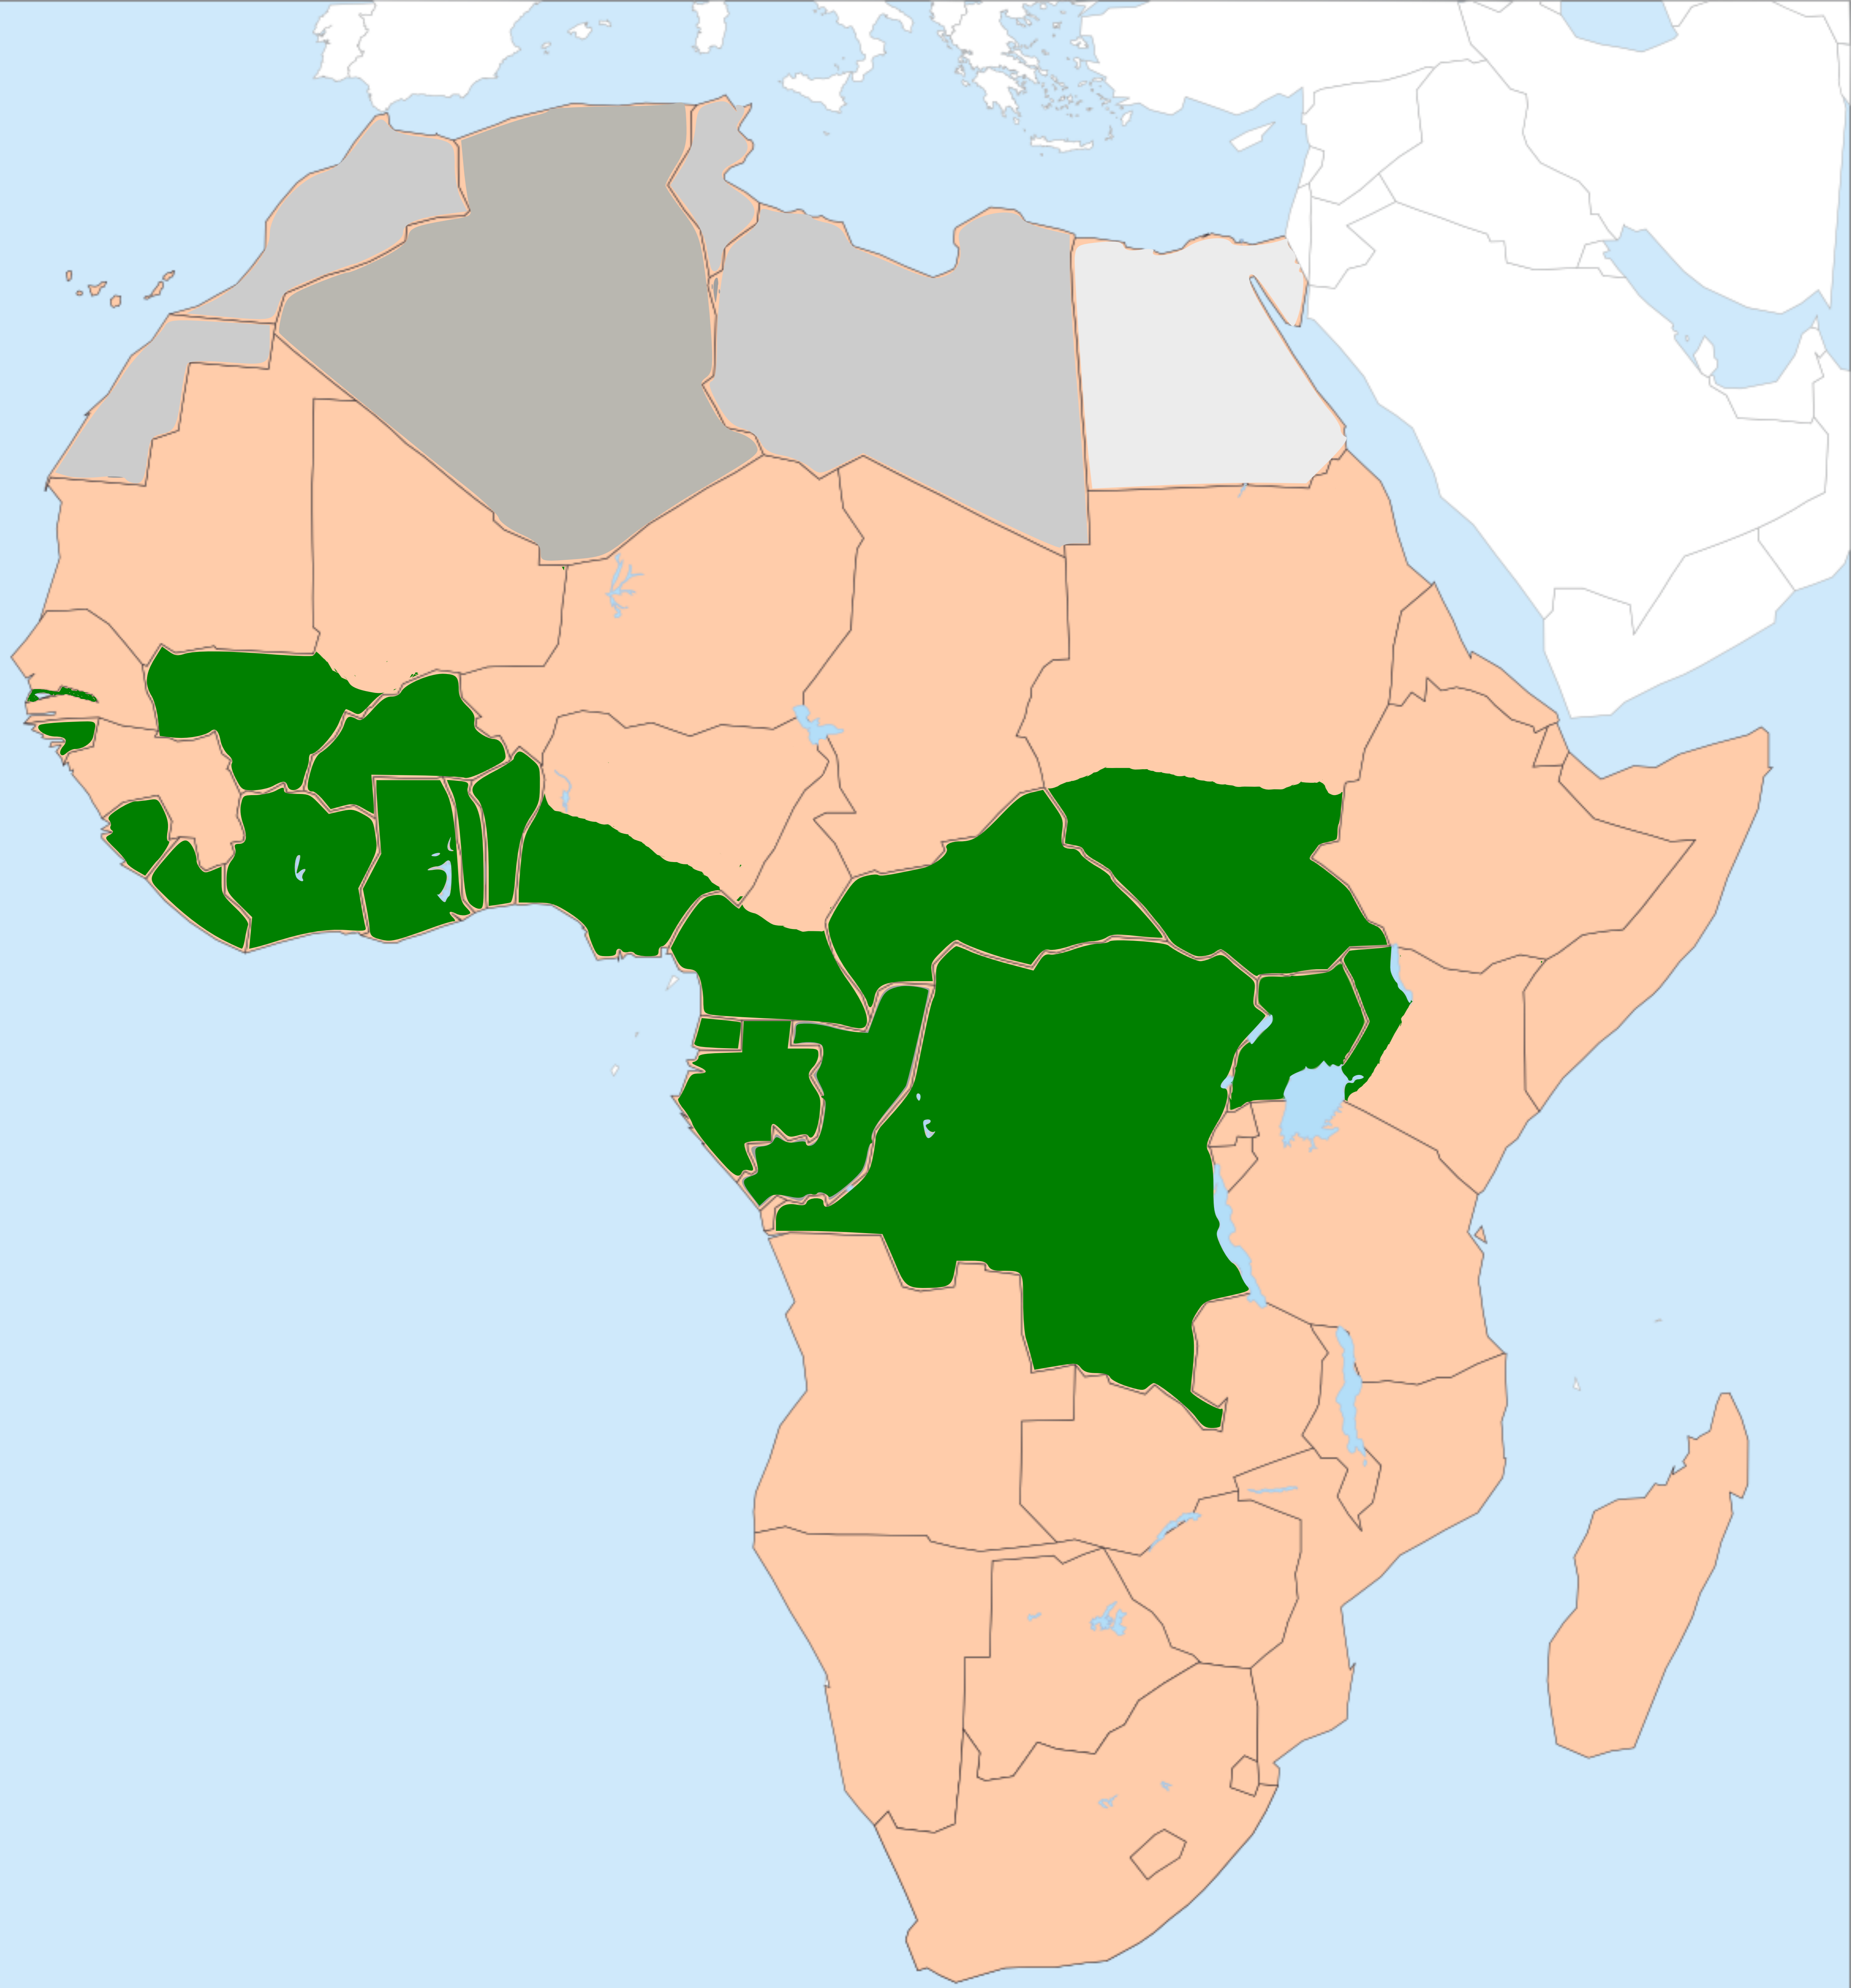

Supplement: Supplementary file 1 [file we-18-81-2018-supplement.zip › supplement_Fig S6.pdf]

# Regression estimates

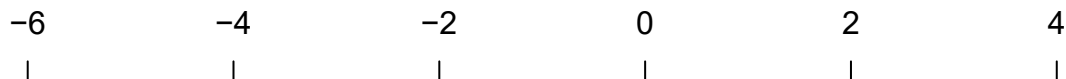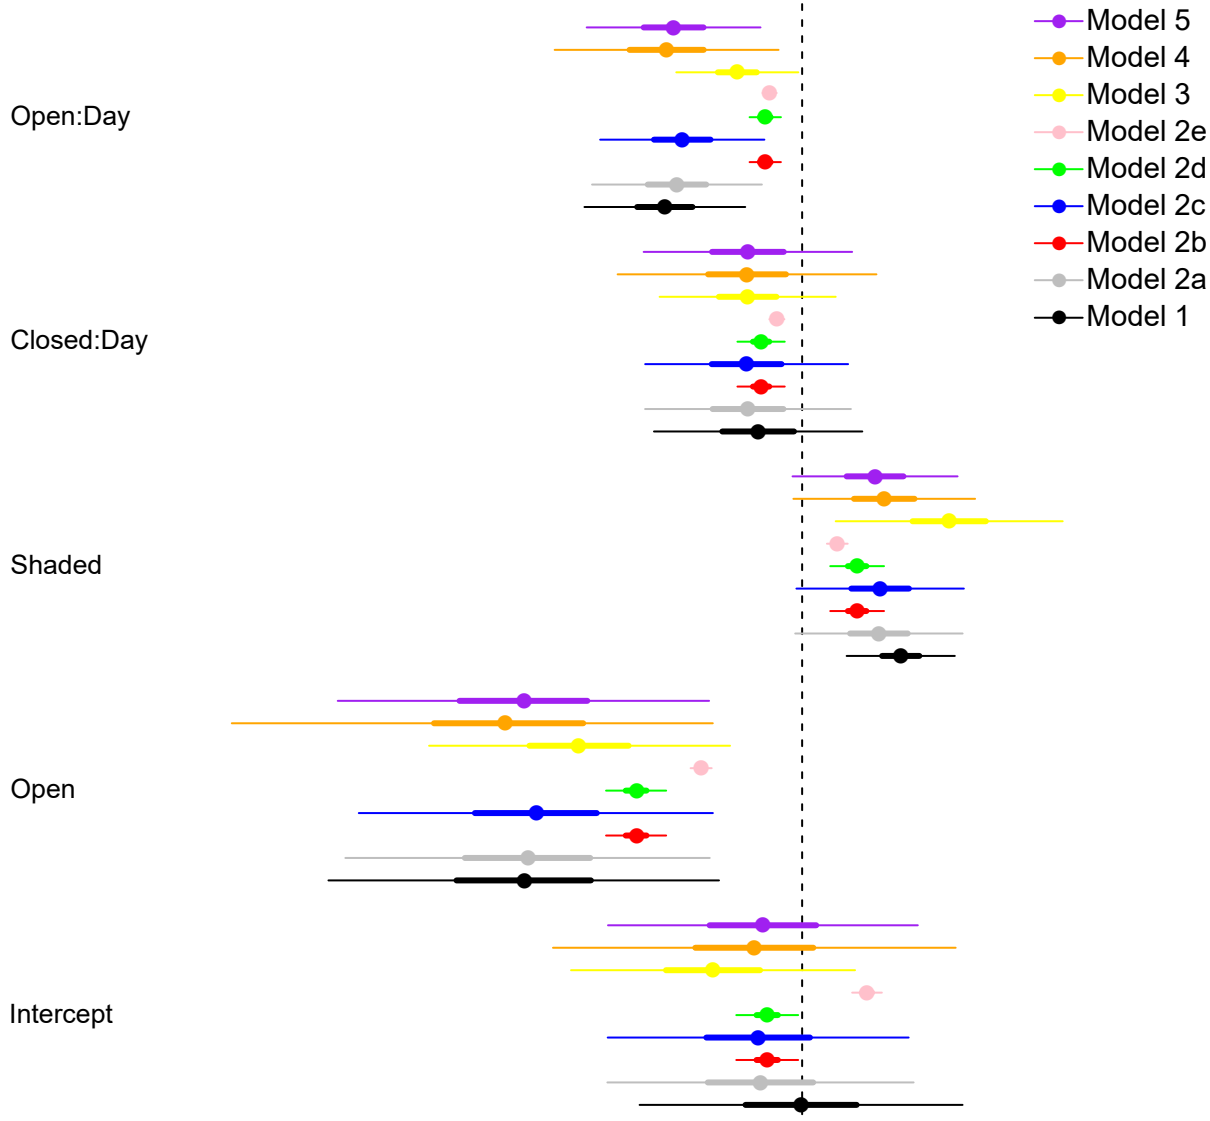

Supplement: Supplementary file 1 [file we-18-81-2018-supplement.zip › supplement_Fig S5.pdf]
